# Supplementary material for: Long‐Term Particulate Matter Exposure and Incidence of Arrhythmias: A Cohort Study
Source: PubMed Central journal article supplement — J Am Heart Assoc. 2020 Nov 4;9(22):e016885. doi: 10.1161/JAHA.120.016885 (PMC7763729; doi:10.1161/jaha.120.016885), 2020-11-04
Supplement: JAH3-9-e016885-s001.pdf [file JAH3-9-e016885-s001.pdf]

# **Supplemental Material**

**Table S1. Cases and person-year for arrhythmias during follow-up visits.**

|                   | Outcomes        |                     |                                   |                              |               |                  |              |                        |                  |
|-------------------|-----------------|---------------------|-----------------------------------|------------------------------|---------------|------------------|--------------|------------------------|------------------|
|                   | Bradycardia     | Atrial fibrillation | Premature Ventricular Contraction | Premature Atrial Contraction | Tachycardia   | RBBB             | LBBB         | Atrioventricular block | Others           |
| PM <sub>10</sub>  | 6,373/1,031,827 | 180/1,049,008       | 1,705/1,042,506                   | 670/1,047,251                | 669/1,046,556 | 4,760 /1,032,103 | 42/1,043,399 | 26/1,043,417           | 1,792 /1,042,900 |
| PM <sub>2.5</sub> | 5,499/590,311   | 116/602,578         | 1,186/600,144                     | 488/601,674                  | 450/601,803   | 3,732/585,312    | 22/598,223   | 5/598,251              | 1,298/599,501    |

**Table S2. ORs (95% CI) for each 10  $\mu\text{g}/\text{m}^3$  increase in particulate matter exposure associated with risk of any arrhythmias in Kangbuk Samsung Health Study (KSHS) cohort from 2002 to 2016. (use longer exposure datasets)**

| Exposures         | Models  | 12-month          | 36-month          | 60-month          |
|-------------------|---------|-------------------|-------------------|-------------------|
| PM <sub>10</sub>  | model 1 | 1.10 (1.04, 1.16) | 1.08 (1.03, 1.14) | 1.12 (1.06, 1.18) |
|                   | model 2 | 1.11 (1.05, 1.18) | 1.09 (1.03, 1.15) | 1.12 (1.06, 1.19) |
| PM <sub>2.5</sub> | model 1 | 1.20 (1.08, 1.33) | 1.13 (1.01, 1.25) |                   |
|                   | model 2 | 1.19 (1.07, 1.32) | 1.11 (1.00, 1.23) |                   |

Model 1. Adjusted for age (continuous), sex (men or women), study center (Seoul or Suwon), year of visit (continuous), and education level (no education, elementary school, middle school, high school, technical college, and university or more). Model 2. Additionally, systolic blood pressure (continuous), smoking status (never, current, former), height (continuous), weight (continuous), alcohol consumption (none, moderate, or excessive), physical activity (none, <3 times per week, or  $\geq 3$  times per week), and history of diabetes (yes or no) and history of hypertension (yes or no). PM<sub>10</sub>, particulate matter of less than 10  $\mu\text{m}$  in aerodynamic diameter; PM<sub>2.5</sub>, particulate matter of less than 2.5  $\mu\text{m}$  in aerodynamic diameter.

**Table S3. ORs (95% CI) for secondary outcomes associated with particulate matter****exposures (use longer exposure datasets)**

| Arrhythmias                       | Exposure          | Models  | Exposure Duration |                   |                   |
|-----------------------------------|-------------------|---------|-------------------|-------------------|-------------------|
|                                   |                   |         | 12-month          | 36-month          | 60-month          |
| Atrial Fibrillation               | PM <sub>10</sub>  | Model 1 | 1.24 (0.61, 2.55) | 1.28 (0.62, 2.66) | 1.33 (0.66, 2.67) |
|                                   |                   | Model 2 | 1.25 (0.61, 2.56) | 1.29 (0.62, 2.69) | 1.34 (0.67, 2.70) |
|                                   | PM <sub>2.5</sub> | Model 1 | 1.02 (0.50, 2.07) | 0.93 (0.48, 1.84) |                   |
|                                   |                   | Model 2 | 0.93 (0.47, 1.84) | 0.94 (0.48, 1.84) |                   |
| Bradycardia                       | PM <sub>10</sub>  | Model 1 | 1.19 (1.10, 1.28) | 1.19 (1.10, 1.29) | 1.19 (1.10, 1.29) |
|                                   |                   | Model 2 | 1.21 (1.12, 1.31) | 1.21 (1.11, 1.31) | 1.21 (1.12, 1.31) |
|                                   | PM <sub>2.5</sub> | Model 1 | 1.14 (0.99, 1.31) | 1.22 (1.05, 1.41) |                   |
|                                   |                   | Model 2 | 1.12 (0.97, 1.29) | 1.19 (1.03, 1.38) |                   |
| Premature Ventricular Contraction | PM <sub>10</sub>  | Model 1 | 1.07 (0.90, 1.28) | 1.03 (0.85, 1.24) | 1.04 (0.86, 1.25) |
|                                   |                   | Model 2 | 1.07 (0.90, 1.28) | 1.03 (0.85, 1.24) | 1.04 (0.86, 1.25) |
|                                   | PM <sub>2.5</sub> | Model 1 | 0.85 (0.61, 1.20) | 0.83 (0.59, 1.16) |                   |
|                                   |                   | Model 2 | 0.86 (0.61, 1.21) | 0.84 (0.60, 1.16) |                   |
| Premature Atrial Contraction      | PM <sub>10</sub>  | Model 1 | 1.28 (0.98, 1.68) | 1.35 (1.03, 1.75) | 1.38 (1.06, 1.79) |
|                                   |                   | Model 2 | 1.28 (0.98, 1.68) | 1.35 (1.04, 1.76) | 1.39 (1.07, 1.80) |
|                                   | PM <sub>2.5</sub> | Model 1 | 0.99 (0.55, 1.80) | 0.96 (0.53, 1.74) |                   |
|                                   |                   | Model 2 | 0.99 (0.55, 1.80) | 0.96 (0.53, 1.74) |                   |
| Conduction Disorder               | PM <sub>10</sub>  | Model 1 | 0.99 (0.90, 1.09) | 0.94 (0.85, 1.04) | 1.02 (0.93, 1.13) |
|                                   |                   | Model 2 | 1.01 (0.92, 1.11) | 0.96 (0.86, 1.06) | 1.04 (0.94, 1.15) |
|                                   | PM <sub>2.5</sub> | Model 1 | 1.55 (1.27, 1.89) | 1.19 (0.99, 1.44) |                   |
|                                   |                   | Model 2 | 1.52 (1.24, 1.85) | 1.17 (0.97, 1.41) |                   |
| Tachycardia                       | PM <sub>10</sub>  | Model 1 | 1.03 (0.75, 1.41) | 1.08 (0.79, 1.47) | 1.06 (0.78, 1.43) |
|                                   |                   | Model 2 | 0.98 (0.72, 1.34) | 1.04 (0.77, 1.42) | 1.03 (0.76, 1.39) |
|                                   | PM <sub>2.5</sub> | Model 1 | 0.92 (0.60, 1.41) | 0.97 (0.63, 1.50) |                   |
|                                   |                   | Model 2 | 0.93 (0.61, 1.43) | 1.00 (0.65, 1.55) |                   |
| Other                             | PM <sub>10</sub>  | Model 1 | 1.11 (0.95, 1.30) | 1.10 (0.94, 1.30) | 1.22 (1.04, 1.42) |
|                                   |                   | Model 2 | 1.11 (0.95, 1.31) | 1.11 (0.94, 1.31) | 1.22 (1.05, 1.43) |
|                                   | PM <sub>2.5</sub> | Model 1 | 0.97 (0.70, 1.34) | 0.87 (0.64, 1.18) |                   |
|                                   |                   | Model 2 | 0.96 (0.69, 1.33) | 0.86 (0.64, 1.16) |                   |

Model 1. Adjusted for age (continuous), sex (men or women), study center (Seoul or Suwon), year of visit (continuous), and education level (no education, elementary school, middle school, high school, technical college, and university or more). Model 2. Additionally, systolic blood pressure (continuous), smoking status (never, current, former), height (continuous), weight (continuous), alcohol consumption (none, moderate, or excessive), physical activity (none, <3 times per week, or ≥3 times per week), and history of diabetes (yes or no) and history of hypertension (yes or no). PM<sub>10</sub>, particulate matter of less than 10 μm in aerodynamic diameter; PM<sub>2.5</sub>, particulate matter of less than 2.5 μm in aerodynamic diameter.
